# Supplementary material for: Effect of calcination temperature on the Cu–ZrO2 interfacial structure and its catalytic behavior in the hydrogenation of dimethyl oxalate
Source: Royal Society of Chemistry journal article supplement (doi:10.1039/d2cy01210c), 2022-01-01
Supplement: d2cy01210c1.pdf [file d2cy01210c1.pdf]

## Electronic Supplementary Information

### **Effect of calcination temperature on the Cu-ZrO<sub>2</sub> interfacial structure and its catalytic behavior in the hydrogenation of dimethyl oxalate**

Yuxi Xu, Huijiang Huang, Lingxin Kong and Xinbin Ma\*

Key Laboratory for Green Chemical Technology of Ministry of Education, Collaborative Innovation Center of Chemical Science and Engineering, School of Chemical Engineering and Technology, Tianjin University, Tianjin 300072, China

## Contents

**Fig. S1.** XRD for the calcined catalysts CZ-750 and CZ-800.

**Fig. S2.** N<sub>2</sub> physical adsorption-desorption curves (a) and pore distribution curves calculated by BJH methods (b) for Cu/ZrO<sub>2</sub> catalysts.

**Fig. S3.** TEM images (a, b) and HRTEM (c) for the calcined CZ-600.

**Fig. S4.** Elemental mapping for the calcined CZ-600.

**Fig. S5.** TEM for reduced CZ-500 (a), CZ-550 (b), CZ-600 (c) and CZ-700 (d).

**Fig. S6.** HRTEM for the reduced CZ-400 (a, b) and CZ-550 (c, d).

**Table S1.** The particles size calculated from the XRD results.

**Table S2.** Atomic ratios of calcined and reduced CZ-600 catalyst confirmed by EDX mapping.

**Table S3.** Catalytic performance of copper catalysts in DMO hydrogenation to EG in the reference literature.

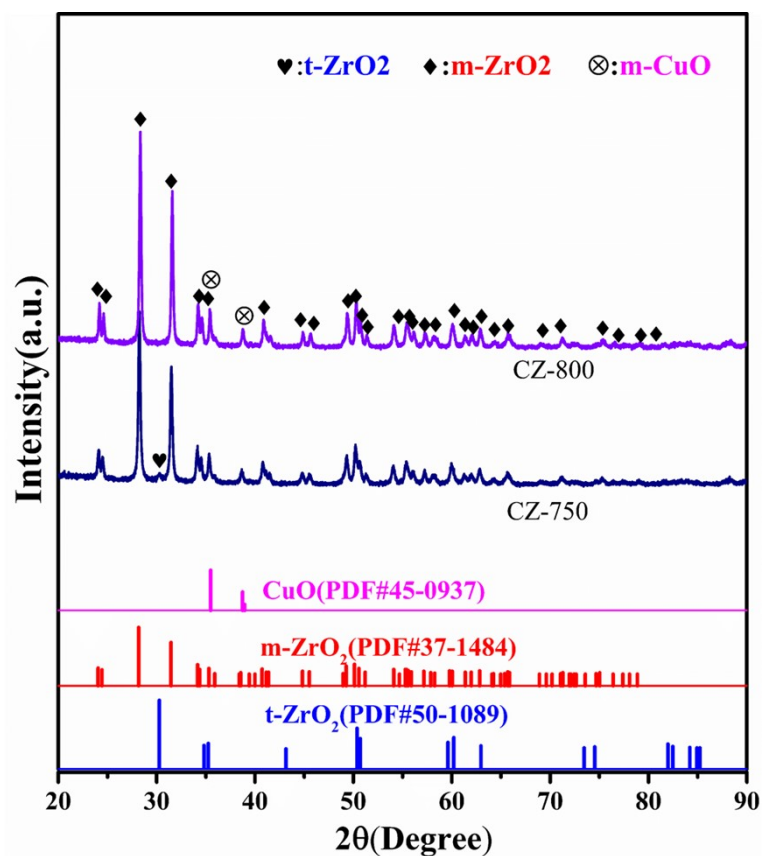

Fig. S1. XRD for the calcined catalysts CZ-750 and CZ-800.

Table S1. The particles size calculated from the XRD results.

| Catalysts | d(nm)              | d(nm)              | d(nm) |
|-----------|--------------------|--------------------|-------|
|           | t-ZrO <sub>2</sub> | m-ZrO <sub>2</sub> | CuO   |
| CZ-750    | -                  | 44.1               | 31.2  |
| CZ-800    | -                  | 53.8               | 41.2  |

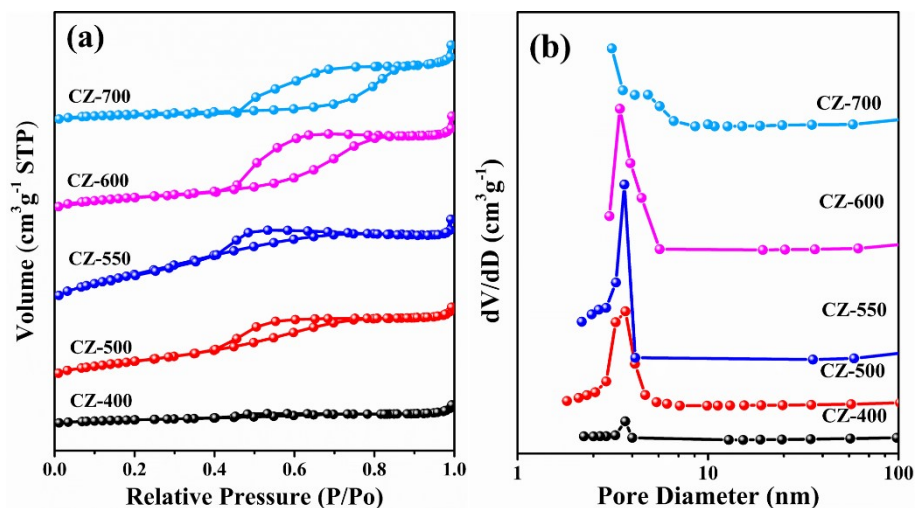

Fig. S2. N<sub>2</sub> physical adsorption-desorption curves (a) and pore distribution curves calculated by BJH methods (b) for Cu/ZrO<sub>2</sub> catalysts.

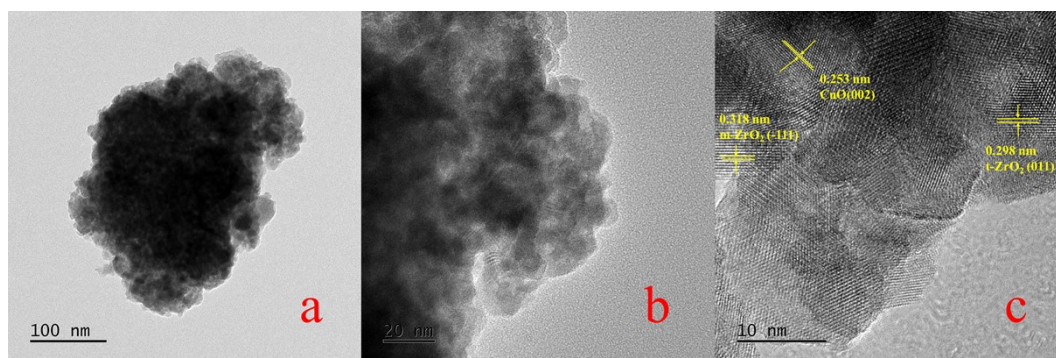

Fig. S3 . TEM images (a, b) and HRTEM (c) for the calcined CZ-600.

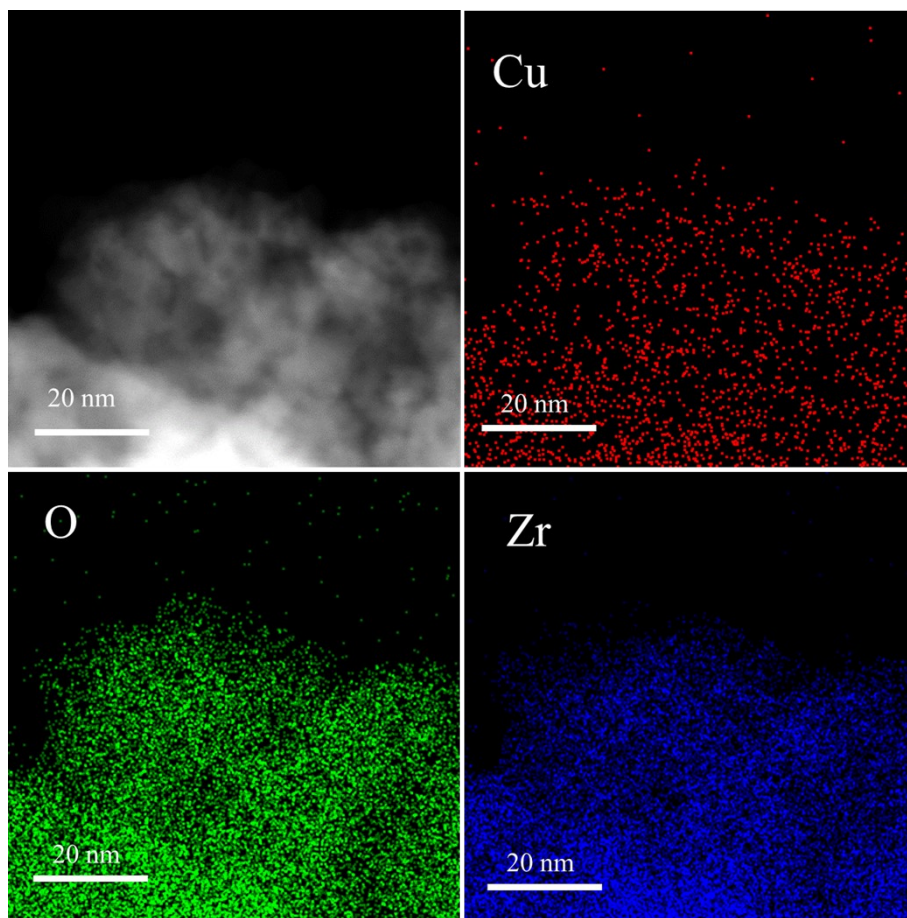

Fig. S4. Elemental mapping for the calcined CZ-600.

Table S2. Atomic ratios of calcined and reduced CZ-600 catalyst confirmed by EDX mapping.

| Catalysts             | Mass% |      |       |        | Atom% |      |       |        |
|-----------------------|-------|------|-------|--------|-------|------|-------|--------|
|                       | O K   | Cu K | Zr L  | Cu/Zr  | O K   | Cu K | Zr L  | Cu/Zr  |
| CuZr-600 <sup>C</sup> | 31.35 | 2.15 | 66.50 | 0.0323 | 71.98 | 1.24 | 26.78 | 0.0463 |
| CuZr-600 <sup>R</sup> | 40.75 | 2.13 | 57.12 | 0.0373 | 79.43 | 1.04 | 19.53 | 0.0533 |

C: calcined; R: reduced.

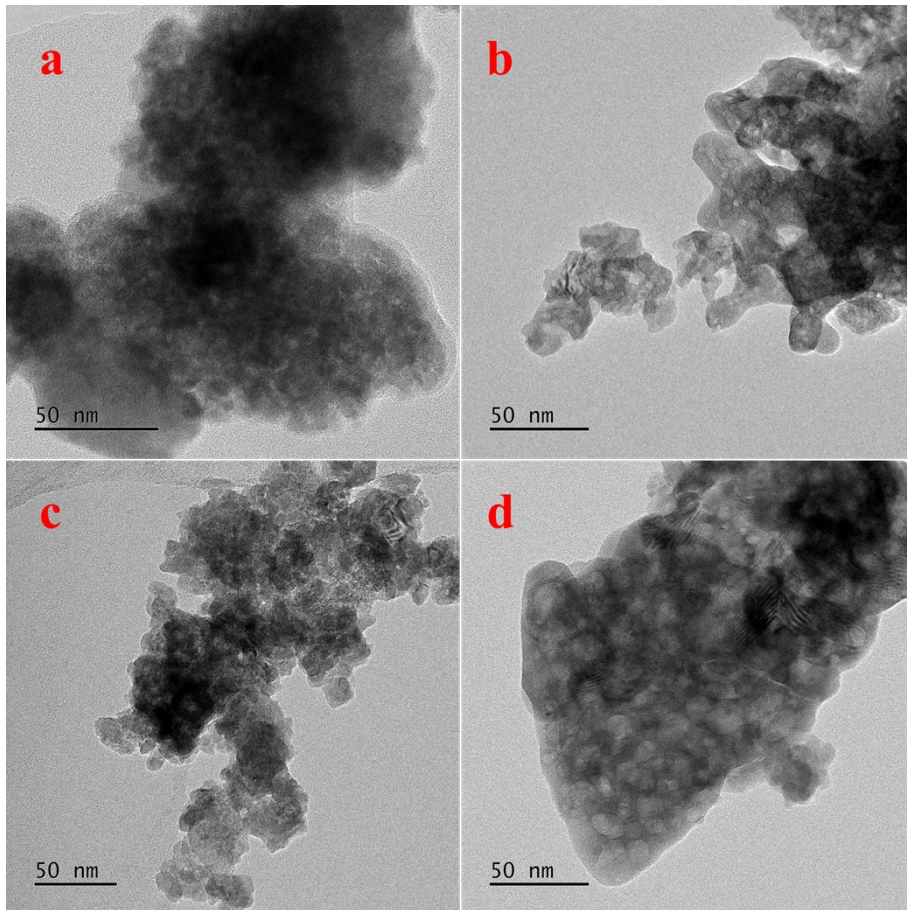

Fig. S5. TEM for reduced CZ-500 (a), CZ-550 (b), CZ-600 (c) and CZ-700 (d).

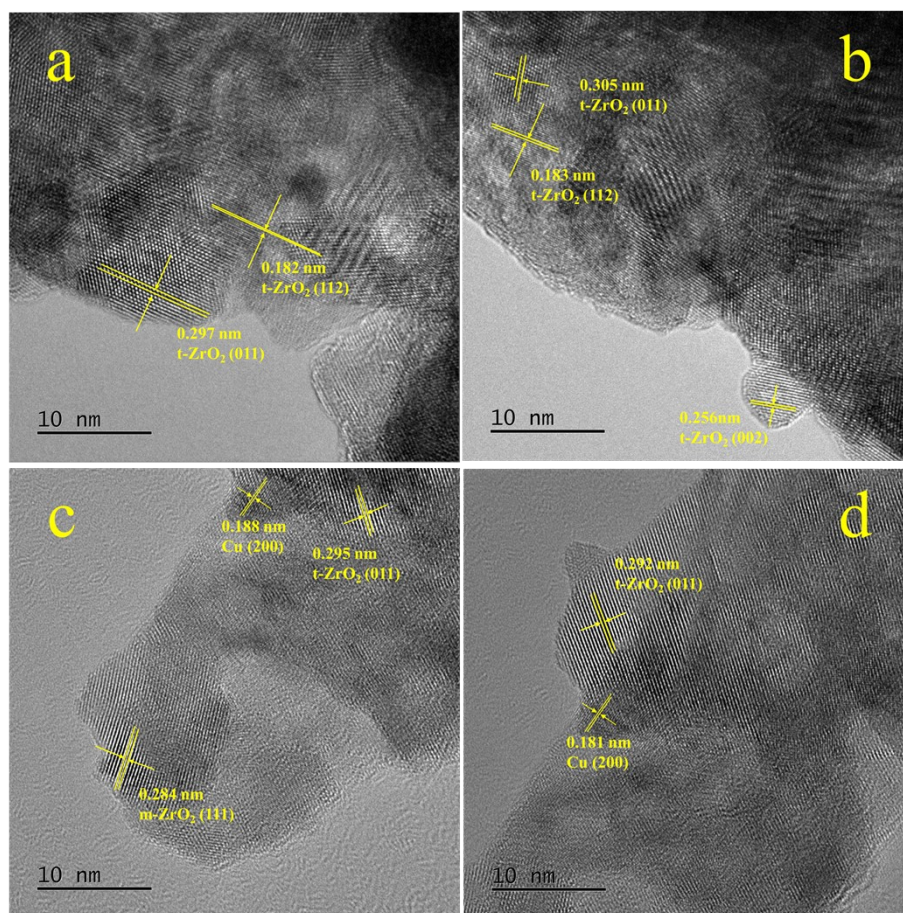

Fig. S6. HRTEM for the reduced CZ-400 (a, b) and CZ-550 (c, d).

Table S3 Catalytic performance of copper catalysts in DMO hydrogenation to EG in the reference literature.

| Catalysts                | Copper loading | C(DMO) | S(EG) | T/°C | P/MPa | H <sub>2</sub> /DMO | WHSV |
|--------------------------|----------------|--------|-------|------|-------|---------------------|------|
| 32CLZ700 <sup>1</sup>    | 32 wt.%        | ~97%   | ~98%  | 220  | 2.4   | 80                  | 1.2  |
| 50CZ <sup>2</sup>        | 50 wt.%        | 99%    | 96%   | 220  | 2.4   | 80                  | 1.0  |
| CuZnZr-0.2 <sup>3</sup>  | 50 wt.%        | 100%   | 92%   | 220  | 3     | 150                 | 0.3  |
| CZA-600 <sup>4</sup>     | 24 wt.%        | 100%   | 95%   | 220  | 2.5   | 160                 | 0.3  |
| Cu/SBA-15 <sup>5</sup>   | 50 wt.%        | 100%   | 99%   | 200  | 2.5   | 100                 | 0.6  |
| CuSiZr1-850 <sup>6</sup> | 37 wt.%        | 100%   | 96%   | 190  | 3     | 150                 | 0.3  |

## References

- 1 J. Ding, H. Liu, M. Wang, H. Tian, J. Wu, G. Yu, Y. Wang, *ACS Omega*, 2020, **5**, 28212-28223.
- 2 J. Ding, H. Liu, H. Fan, S. Chen, Y. Wang, W. He, G. Yu, L. Ma, J. Chen, *Catal. Commun.*, 2019, **121**, 62-67.
- 3 Y. Zhu, X. Kong, H. Zheng, Y. Zhu, *Mol. Catal.*, 2018, **458**, 73-82.
- 4 S. Zhang, Q. Liu, G. Fan, F. Li, *Catal. Lett.*, 2012, **142**, 1121-1127.
- 5 X. Guo, A. Yin, W.-L. Dai, K. Fan, *Catal. Lett.*, 2009, **132**, 22-27.
- 6 Y. Zhu, X. Kong, D.-B. Cao, J. Cui, Y. Zhu, Y.-W. Li, *ACS Catal.*, 2014, **4**, 3675-3681.
